# Supplementary material
Source: PubMed Central journal article supplement (PMC2949506)
Supplement: NIHMS231786-supplement-01.pdf [file NIHMS231786-supplement-01.pdf]

## **SUPPLEMENTARY MATERIAL**

### **Figure S1.**

Mass spectra of proteins used for conformational studies. (**A-E,i**) Intact mass spectra of Elongin BC and Vif constructs used. (**A-E,ii**) Deconvoluted mass spectra of Elongin BC and Vif constructs used.

### **Figure S2.**

HX MS titration results for all Vif:Elongin BC interactions. Panel A is the same as the data shown in Figure 3. The +7 charge state of Elongin C is shown in the presence of each Vif construct at the ratios indicated. As in Figure 3, the blue distribution represents the unbound form of Elongin C and the red distribution represents the bound form.

### **Figure S3.**

SDS PAGE gels of (A) anion exchange and (B) size exclusion chromatography purification steps of the Elongin BC complex. The two proteins have high affinity for one another and are always found together from the moment of expression.

### **Figure S4.**

HX MS peptide data for Elongin B and C. These data include those shown in Figure 5. All peptides that could be followed are shown. Some peptides do not have data in the presence of Vif due to interference from Vif peptic peptides.

**Figure S5.**

Deuterium exchange into intact Vif in the absence and presence of the Elongin BC complex.

The error of determining the deuterium level was  $\pm 2$  Da.

**Movie S1.**

Animation (approximately 6 seconds) illustrating the deuterium incorporation for the pepsin digested Elongin BC over time. Frames are: 0, 10 s, 1 m, 5 m, and 20 m, as indicated. See also Figure 4C.

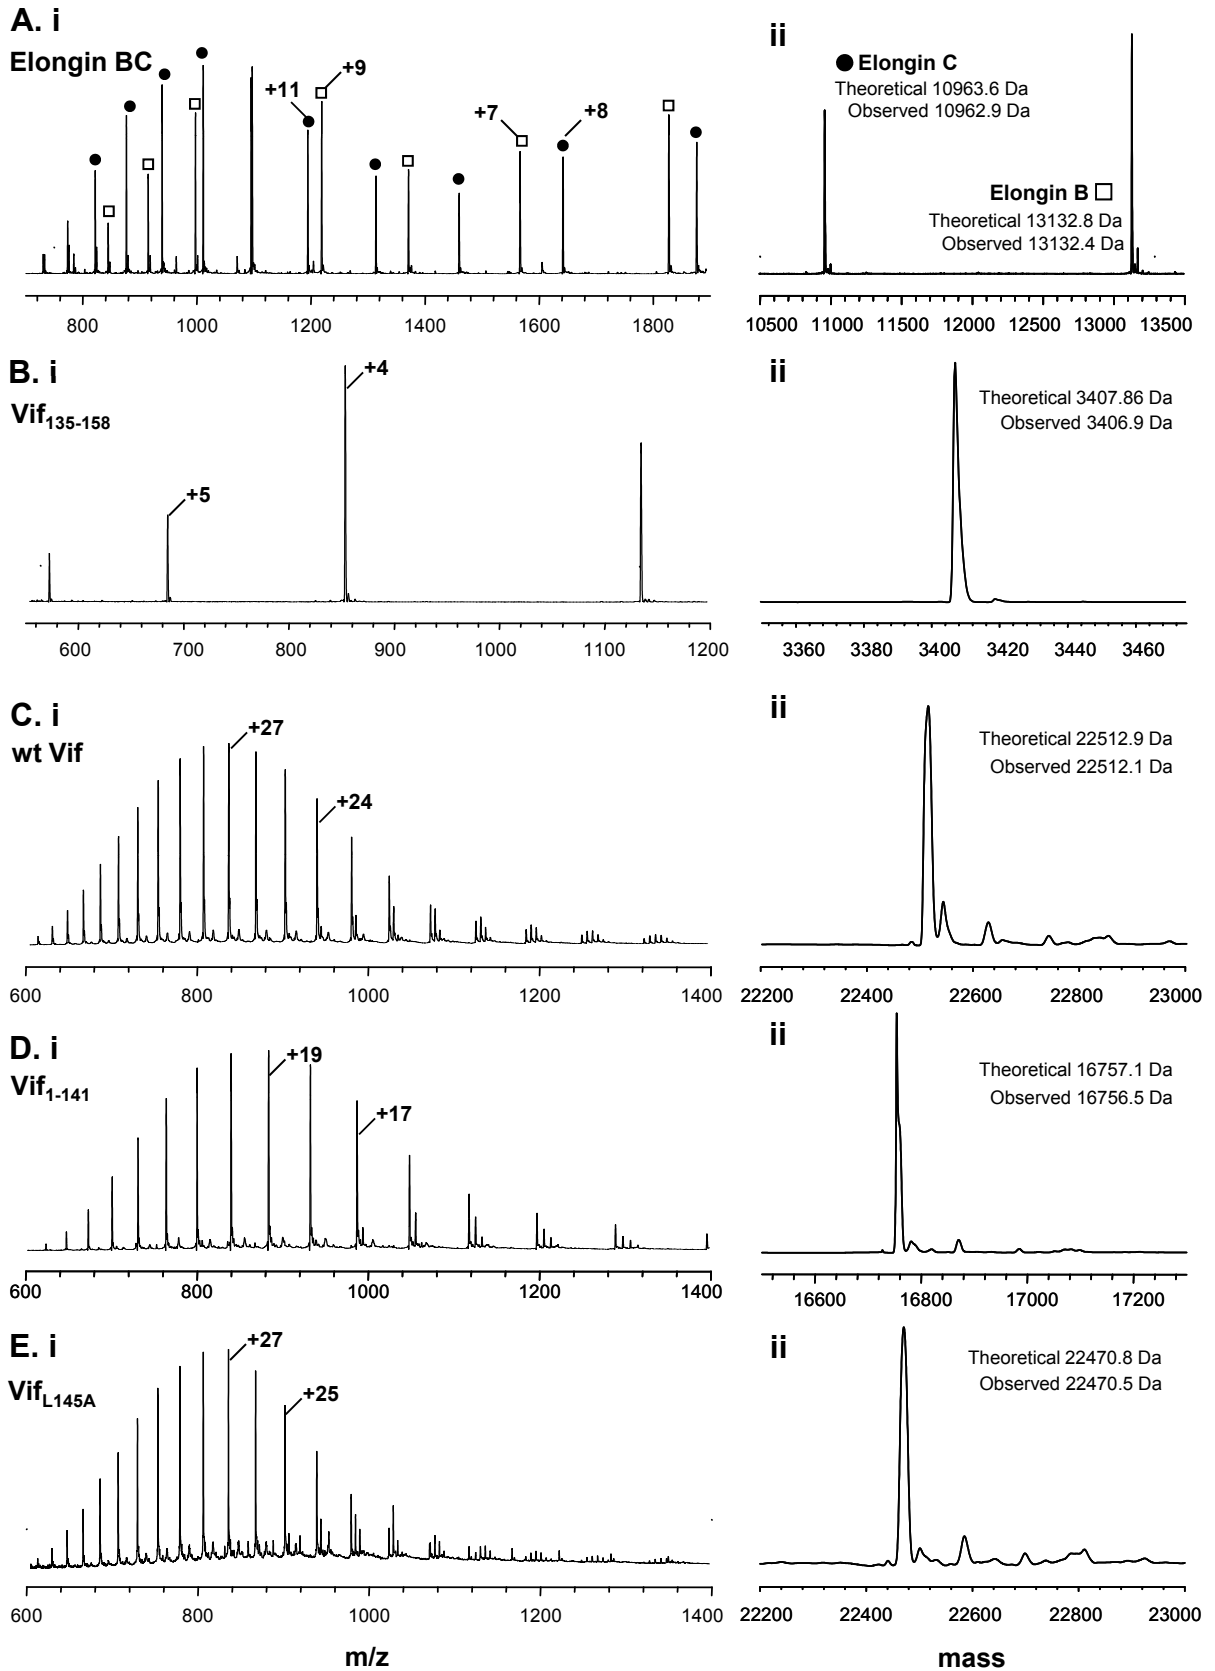

Figure S1

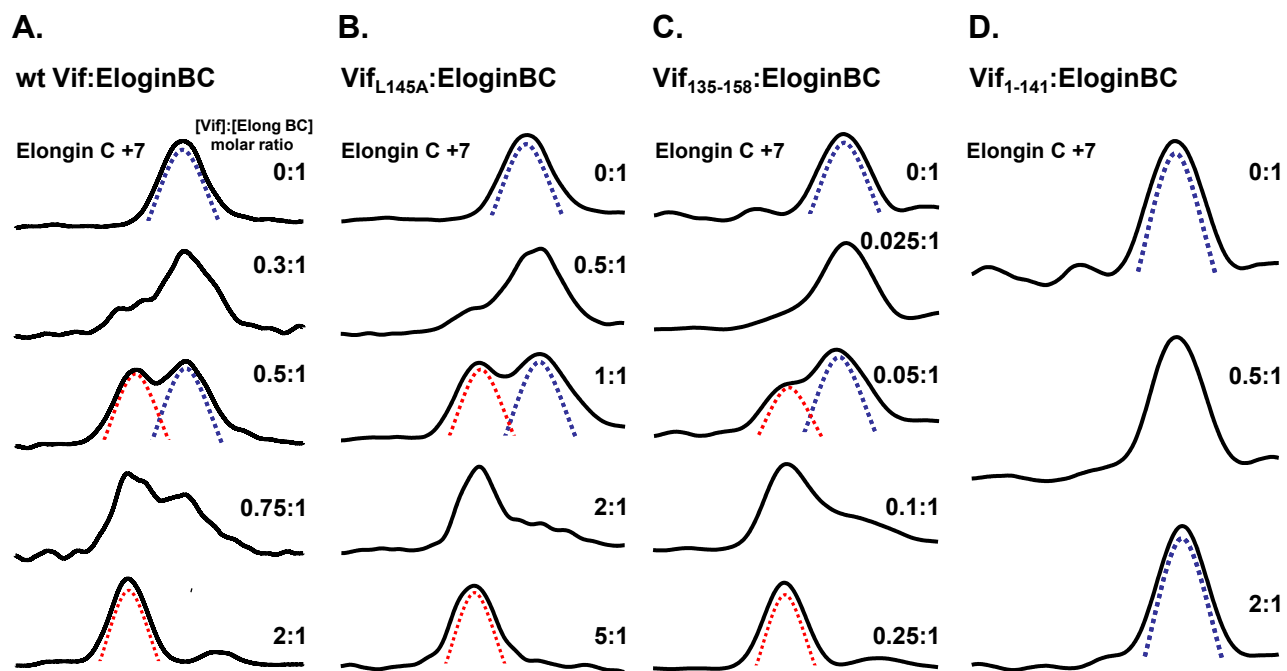

Figure S2

**A. Elongin BC anion exchange fractions**

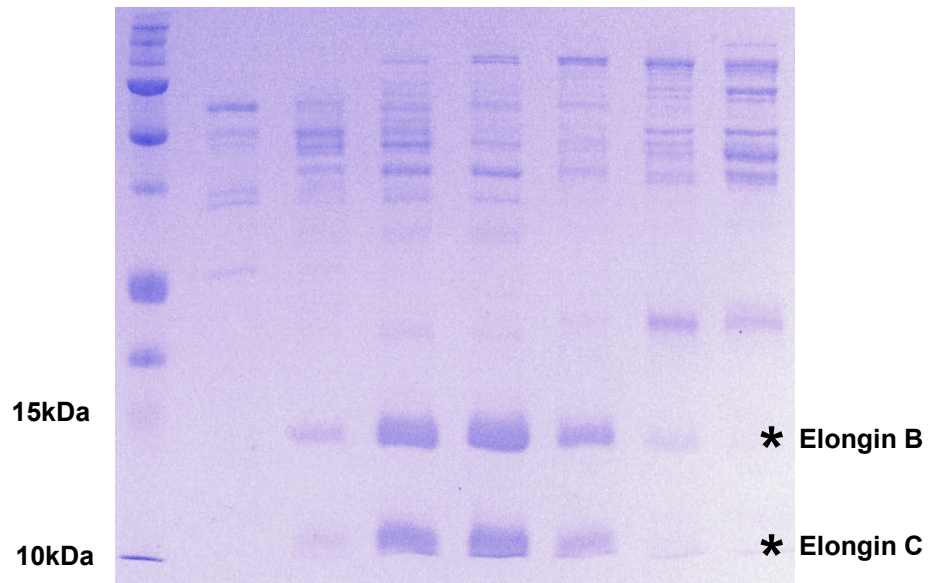

**B. Elongin BC size exclusion fractions**

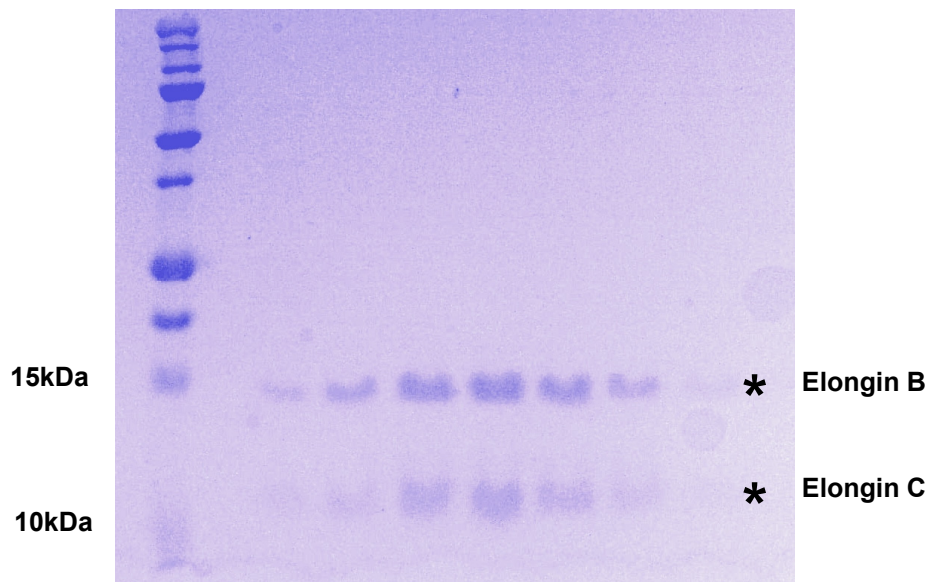

Figure S3

# Elongin C peptic peptides

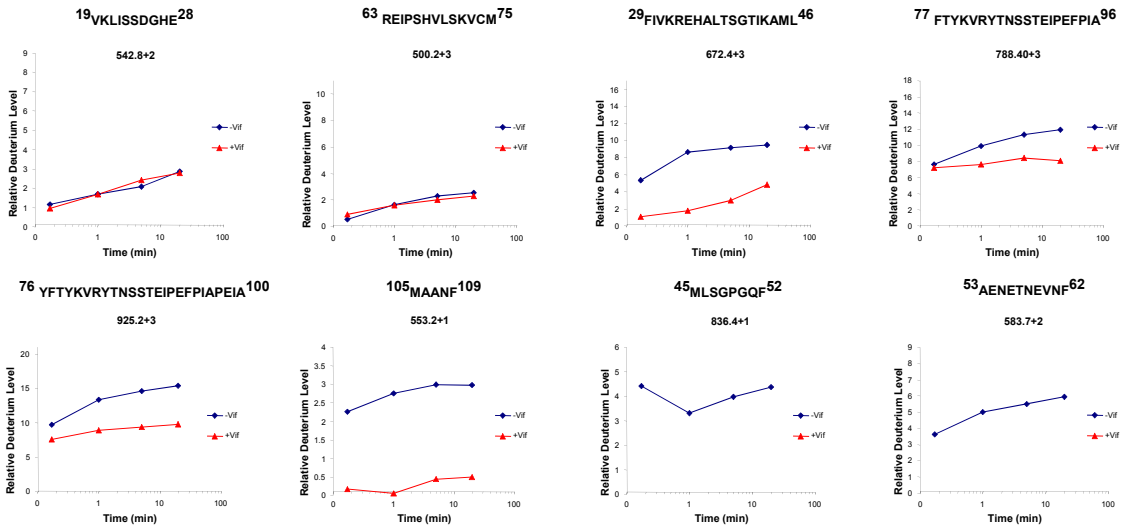

# Elongin B peptic peptides

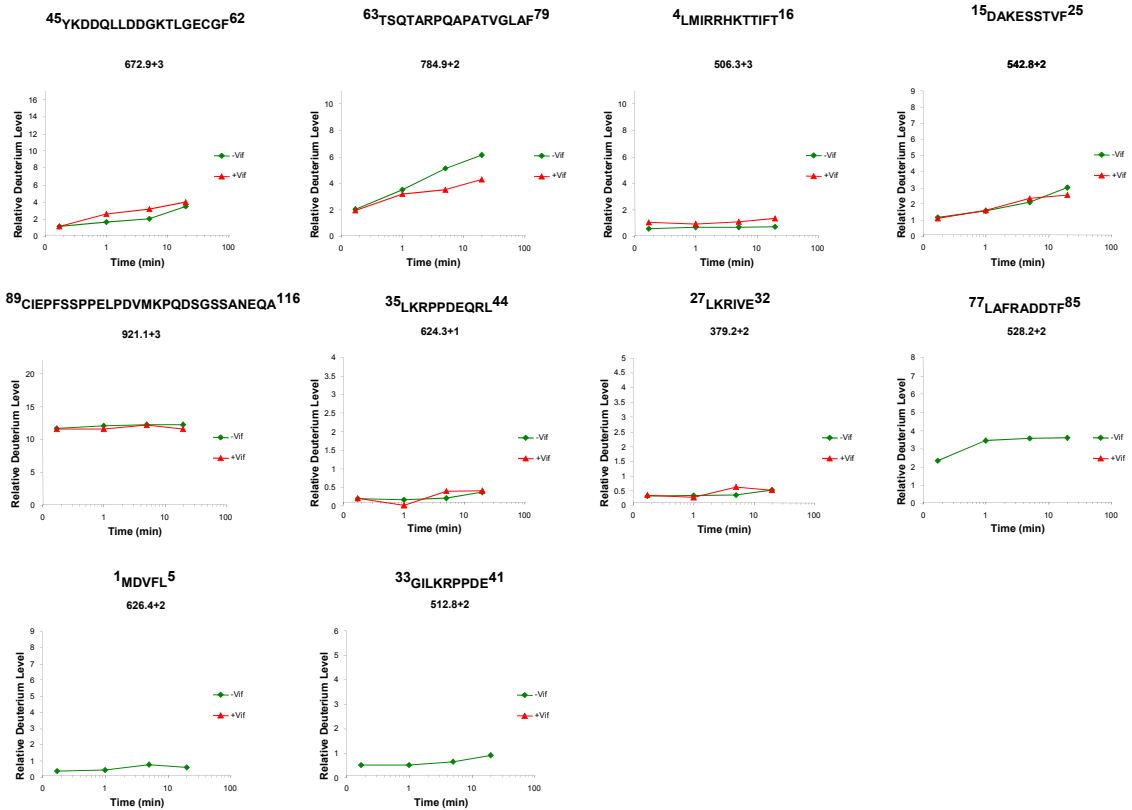

Figure S4

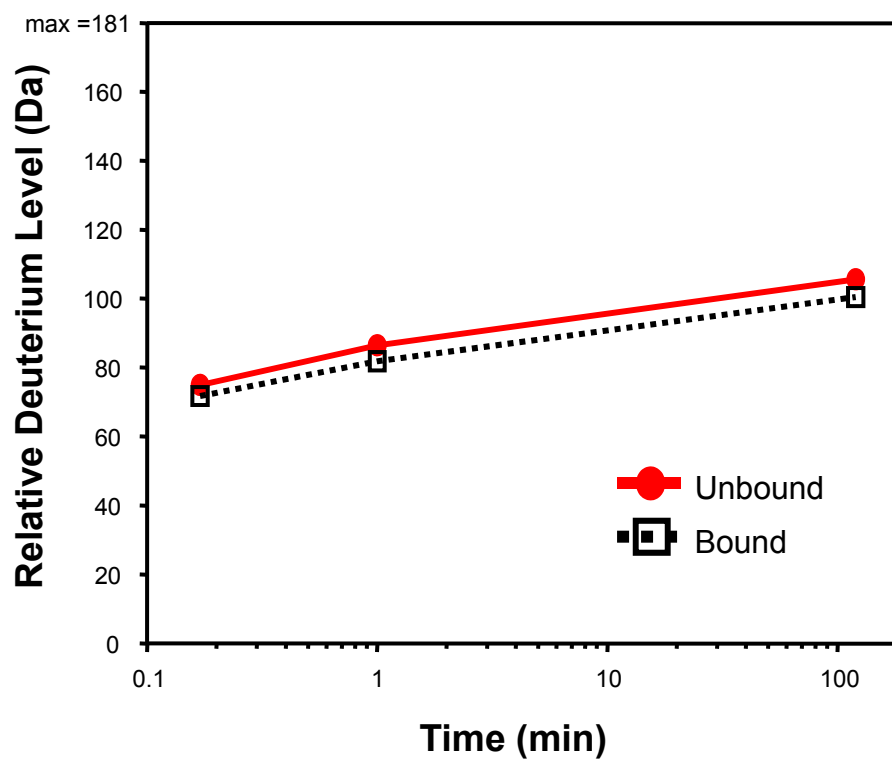

Figure S5
